# Supplementary material
Source: Springer Nature journal article supplement (https://www.springermedizin.de/resource/supplementary/13013_2006_8_MOESM1_ESM.pdf/9630756)
Supplement: MOESM1 [file 9630756]

# The experience of brace treatment

```
graph TD; A[The experience of brace treatment] --> B[Feelings related with brace treatment]; A --> C[Receiving information]; A --> D[Support and help provided by health professionals]; A --> E[Support provided by family and friends]; B --> B1[1. Stress]; B --> B2[2. Fear]; B --> B3[3. Anger]; B --> B4[4. Shame]; C --> C1[1. About scoliosis]; C --> C2[2. About brace treatment]; D --> D1[1. Orthopedic doctor]; D --> D2[2. Physiotherapist]; D --> D3[3. Psychologist]; E --> E1[1. Parents]; E --> E2[2. Mother]; E --> E3[3. Friends]; E --> E4[4. Classmates];
```

Feelings related with brace treatment

1. Stress
2. Fear
3. Anger
4. Shame

Receiving information

1. About scoliosis
2. About brace treatment

Support and help provided by health professionals

1. Orthopedic doctor
2. Physiotherapist
3. Psychologist

Support provided by family and friends

1. Parents
2. Mother
3. Friends
4. Classmates
